# Supplementary material for: Desalting biocrude for improved downstream processing toward marine fuel application
Source: Royal Society of Chemistry journal article supplement (doi:10.1039/d3se00189j), 2023-01-01
Supplement: d3se00189j1.pdf [file d3se00189j1.pdf]

## Supporting Information for Desalting Biocrude for Improved Downstream Processing toward Marine Fuel Application

### Table of Contents

|                                                                                                                                                                                                 |          |
|-------------------------------------------------------------------------------------------------------------------------------------------------------------------------------------------------|----------|
| <b>Supporting Information for Desalting Biocrude for Improved Downstream Processing toward Marine Fuel Application</b> .....                                                                    | <b>1</b> |
| Experimental .....                                                                                                                                                                              | 2        |
| Table S1. Representative ICP Data for Biocrudes .....                                                                                                                                           | 3        |
| Table S2. Representative CHNS For Biocrudes .....                                                                                                                                               | 3        |
| Table S3. Initial Additive Screening and Observations. 1:1 UWBC to water. 80°C. 1 hour.....                                                                                                     | 4        |
| Table S4. Mass% metals extracted from unwashed biocrude (UWBC) at various formic acid concentrations with different additives. ....                                                             | 4        |
| Figure S5. Mass metals extracted from unwashed biocrude (UWBC) at various temperatures in early screening experiments. Concentrations in aqueous phase (left) and Washed Biocrude (right). .... | 5        |
| Table S6. Mass% metals extracted from unwashed biocrude (UWBC) at various formic acid concentrations.....                                                                                       | 5        |
| Figure S7. Mass% metals extracted from unwashed biocrude (UWBC) at various formic acid concentrations.....                                                                                      | 6        |
| Table S8. Metals Concentration in Recovered Aqueous. High-Moisture UWBC treated at various formic acid concentrations.....                                                                      | 6        |
| Figure S9. Mass% metals extracted from unwashed low-moisture biocrude (UWBC) at various formic acid concentrations.....                                                                         | 6        |
| Figure S10. Percent of various elements removed from high-moisture biocrude washed at various UWBC to water mass ratios (1 weight% of unwashed biocrude, 80°C, 1 hour).....                     | 7        |
| Figure S11. Metal removal from low-moisture UWBC at various UWBC to water mass ratios at 80°C, 0.7 weight% formic acid.....                                                                     | 7        |
| Table S12. Percent of various elements removed from high- and low-moisture biocrudes washed with aqueous solutions of formic acid (0.7 weight% of UWBC, 80 °C, 1 hour) .....                    | 8        |
| Figure S13. Metal removal from low-moisture (top) and high moisture UWBC at various wash times at 80C, 0.7 weight% formic acid. ....                                                            | 9        |
| Table S14. Compounds Identified by HPLC in Recovered Aqueous in Scaled Up Washes.....                                                                                                           | 10       |
| Table S15. Compounds identified in Recovered Aqueous by GC-MS. ....                                                                                                                             | 10       |
| Table S16. Metal Content Removed from Biocrude after Washing. ....                                                                                                                              | 11       |
| Table S17. Metals Removed from Biocrude after Washing. 0.75 weight% formic acid .....                                                                                                           | 11       |
| Table S18. Hydrotreating Yield Data.....                                                                                                                                                        | 12       |
| Figure S19. SIMDIST of the hydrotreated product versus fuel oil .....                                                                                                                           | 12       |
| S20. Process description of wet waste hydrothermal liquefaction (HTL) without a water wash process.....                                                                                         | 13       |
| Table S21. Key assumptions for the technoeconomic analysis. ....                                                                                                                                | 14       |

## Experimental

**High-performance liquid chromatography (HPLC)** analyses of samples were carried out using HPLC equipped with a Waters 2414 refractive index detector. A Bio-Rad Aminex HPX-87H ion exclusion column (300 mm × 7.8 mm) was used for analyte separation. Sulfuric acid (0.005 M) was used as eluent at a flow rate of 0.55 mL/min. **Inductively coupled plasma (ICP)** analyses were conducted using a Perkin Elmer Optima 7300-DV ICP-OES equipped with a cyclonic spray chamber and a Meinhard nebulizer. Calibration was performed with certified reference standards. **Gas chromatography–mass spectrometry (GC-MS)** analyses of aqueous samples were carried out using an Agilent 5795C GCMS. The column was an Agilent HP-5MS with a 30 m × 0.25 mm × 0.25 µm film thickness and a carrier gas of helium at 1.0 mL/min. Oven temperature was initially held for 0.1 min at 35 °C, then ramped at 6 °C/min with a final temperature of 325 °C. A final oven hold of 1 minute was used. The inlet was heated at 270 °C, and 1 µL of sample was injected using a splitless injection. **Ion chromatography** samples were analyzed using a Dionex ICS-3000 equipped with a Dionex AS11-AC (4.0 × 250 mm) column and a conductivity detector. Aqueous samples were diluted as necessary to fall within the calibration range. Detection limits range from 1.0 to 100 ppm. Analytes included fluoride, bromide, nitrate, chloride, sulfate, and phosphate. **Nitrogen, ammonia (NH<sub>3</sub>-N), and chemical oxygen demand (COD) analyses** were carried out using a HACH DR2800 following the manufacturer's recommended methods. **Carbon, hydrogen, nitrogen, and sulfur (CHNS) analyses** were carried out using an Elementar Vario Macro Cube. Combustion and reduction tubes were packed accordingly to analyze CHNS. The combustion tube was heated to 1,150 °C and the reduction tube to 850 °C. Helium was used as the carrier gas. All sample data are reported as-is or as-received (not on a dry basis). For **oxygen content**, samples were analyzed using an Elementar Rapid Oxy-Cube. The combustion tube was packed according to manufacturer specifications. The combustion tube was heated to 1,450 °C. Helium was used as the carrier gas.

**Table S1. Representative ICP Data for Biocrudes**

|                | High Moisture UWBC <sup>a</sup> | Low Moisture UWBC <sup>a</sup> | Scaleup UWBC |
|----------------|---------------------------------|--------------------------------|--------------|
| <b>Element</b> | <b>ppm</b>                      | <b>ppm</b>                     | <b>ppm</b>   |
| <i>Al</i>      | 15                              | 18                             | 15           |
| <i>Ca</i>      | 22                              | 50                             | 49           |
| <i>Fe</i>      | 192                             | 317                            | 250          |
| <i>K</i>       | 1063                            | 626                            | 745          |
| <i>Mg</i>      | 16                              | 28                             | 31           |
| <i>Mn</i>      | 15                              | 11                             | BDL          |
| <i>Na</i>      | 3184                            | 1086                           | 1274         |
| <i>Si</i>      | 365                             | 12                             | 127          |
| <i>S</i>       | 1125                            | 1814                           | 1655         |

<sup>a</sup>Differences in the composition of the biocrudes between are attributed to the design of the biocrude recovery tank. The product tank is static and the biocrudes were recovered at different depths in the tank.

High-moisture biocrudes > 20% water, as assessed by KF titration

Low-moisture biocrude ~7% water as assessed by KF titration

**Table S2. Representative CHNS For Biocrudes**

|                | High Moisture UWBC <sup>a</sup> | Low Moisture UWBC <sup>a</sup> | Scaleup UWBC |
|----------------|---------------------------------|--------------------------------|--------------|
| <b>Element</b> | <b>wt%</b>                      | <b>wt%</b>                     | <b>wt%</b>   |
| <i>N</i>       | 3.1                             | 3.5                            | 3.2          |
| <i>C</i>       | 58.8                            | 74.0                           | 71.8         |
| <i>H</i>       | 11.3                            | 11.7                           | 11.2         |
| <i>S</i>       | 0.1                             | 0.1                            | 0.1          |

<sup>a</sup>Differences in the composition of the biocrudes between are attributed to the design of the biocrude recovery tank. The product tank is static and the biocrudes were recovered at different depths in the tank.

**Table S3. Initial Additive Screening and Observations. 1:1 UWBC to water. 80°C. 1 hour.**

| Additive        | Weight% Added (% of Aqueous) | Phase Separation After Heating? |
|-----------------|------------------------------|---------------------------------|
| None            |                              | Limited                         |
| Ethylene Glycol | 10%                          | No                              |
| Formic Acid     | 10%                          | Yes                             |
| Acetic Acid     | 10%                          | Yes                             |
| Citric Acid     | 10%                          | Yes                             |
| EDTA            | 3.3%                         | Yes                             |
| Formic Acid     | 4.8%                         | Yes                             |
| Acetic Acid     | 4.8%                         | Yes                             |
| Citric Acid     | 4.8%                         | Yes                             |
| Malic Acid      | 4.8%                         | Yes                             |
| HDTA Br         | 4.8%                         | Yes                             |
| Fumaric Acid    | 1%                           | Yes                             |
| Glycolic Acid   | 1%                           | Yes                             |
| Succinic Acid   | 1%                           | Yes                             |
| Formic Acid     | 1%                           | Yes                             |
| Sulfuric Acid   | 0.7%                         | Partial                         |

**Table S4. Mass% metals extracted from unwashed biocrude (UWBC) at various formic**

| <i>Element</i> | <i>Percent Mass of Element Transferred to Aqueous Phase</i> |                          |                          |                   |                         | acid concentrations with different additives. |
|----------------|-------------------------------------------------------------|--------------------------|--------------------------|-------------------|-------------------------|-----------------------------------------------|
|                | Formic Acid <sup>1</sup>                                    | Acetic Acid <sup>1</sup> | Citric Acid <sup>1</sup> | EDTA <sup>2</sup> | Malic Acid <sup>1</sup> |                                               |
| <i>Al</i>      | 92%                                                         | 15%                      | 86%                      | 71%               | 87%                     |                                               |
| <i>Ca</i>      | >99%                                                        | >99%                     | >99%                     | >99%              | >99%                    |                                               |
| <i>Fe</i>      | >99%                                                        | 33%                      | 71%                      | 81%               | 66%                     |                                               |
| <i>K</i>       | >99%                                                        | 97%                      | >99%                     | >99%              | >99%                    |                                               |
| <i>Na</i>      | 94%                                                         | 69%                      | 64%                      | 79%               | 73%                     |                                               |
| <i>Zn</i>      | >99%                                                        | 16%                      | >99%                     | >99%              | 85%                     |                                               |
| <i>Mo</i>      | <18%                                                        | <18%                     | <18%                     | 18%               | 19%                     |                                               |
| <i>S</i>       | 7%                                                          | 4%                       | 7%                       | 3%                | 5%                      |                                               |

1: 4.8 wt%. 2: 1.6 wt%

**Figure S5. Mass metals extracted from unwashed biocrude (UWBC) at various temperatures in early screening experiments. Concentrations in aqueous phase (left) and Washed Biocrude (right).**

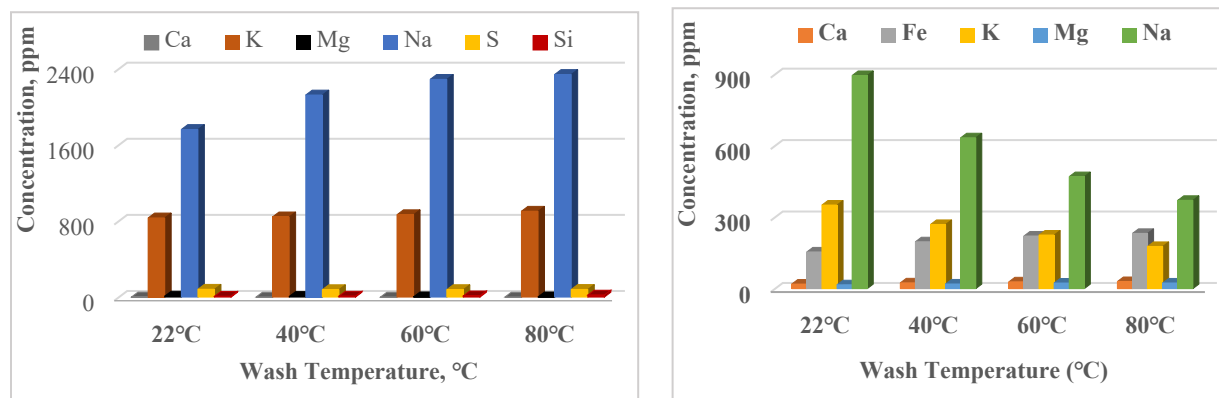

**Table S6. Mass% metals extracted from unwashed biocrude (UWBC) at various formic acid concentrations.**

| Metal Removal, wt% (Aqueous, ICP Basis) |        |       |       |       |      |
|-----------------------------------------|--------|-------|-------|-------|------|
| Formic Acid<br>wt% of<br>Total          | Al     | K     | Mg    | Na    | S    |
| 0.05 Wt%                                | 0.0%   | 40.9% | 0.0%  | 38.1% | 1.8% |
| 0.14 Wt%                                | 16.8%  | 42.8% | 0.0%  | 40.5% | 2.6% |
| 0.3 Wt%                                 | 20.54% | 58.2% | 0.0%  | 65.7% | 1.0% |
| 0.5 Wt%                                 | 28.09% | 76.1% | 10.8% | 85.3% | 0.9% |

**Figure S7. Mass% metals extracted from unwashed biocrude (UWBC) at various formic**

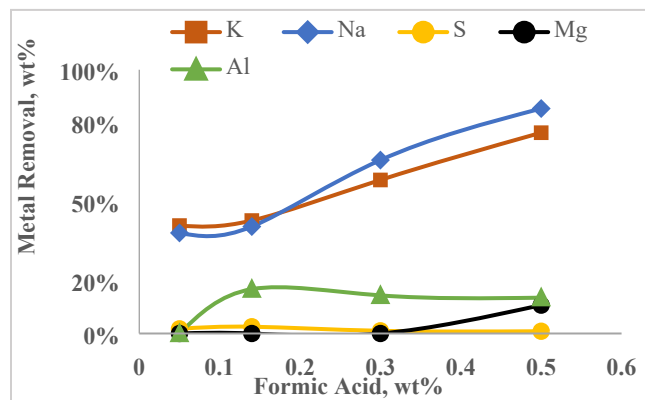

**acid concentrations.**

**Table S8. Metals Concentration in Recovered Aqueous. High-Moisture UWBC treated at various formic acid concentrations.**

| FA/Total, wt% | Al    | Fe    | K     | Mg (oil) | Na    |
|---------------|-------|-------|-------|----------|-------|
| 0.87          | 4.42  | 0.35  | 91.29 | 46.21    | 90.77 |
| 1.51          | 11.63 | 14.13 | 96.66 | 46.30    | 96.17 |
| 2.40          | 20.54 | 44.93 | 95.49 | 46.49    | 93.17 |
| 3.15          | 28.09 | 52.06 | 96.74 | 46.30    | 93.47 |
| 5.07          | 29.14 | 68.09 | 92.62 | 42.49    | 90.71 |
| 7.36          | 37.62 | 74.83 | 97.54 | 44.21    | 96.61 |

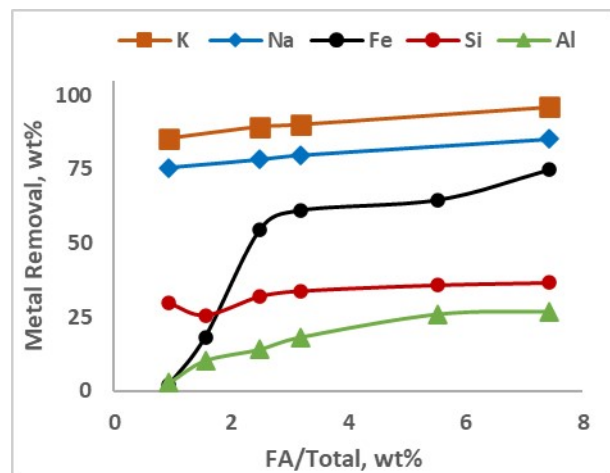

**Figure S9. Mass% metals extracted from unwashed low-moisture biocrude (UWBC) at various formic acid concentrations**

**Figure S10. Percent of various elements removed from high-moisture biocrude washed at various UWBC to water mass ratios (1 weight% of unwashed biocrude, 80°C, 1 hour)**

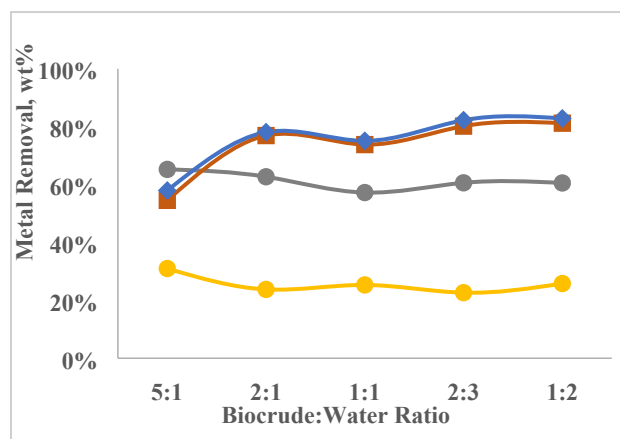

**Figure S11. Metal removal from low-moisture UWBC at various UWBC to water mass**

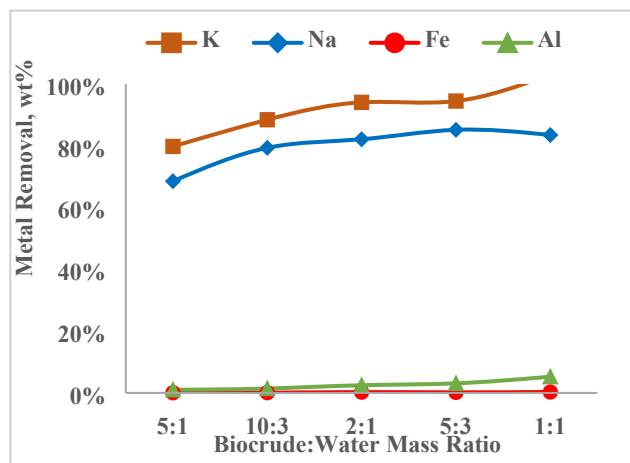

**ratios at 80°C, 0.7 weight% formic acid.**

**Table S12. Percent of various elements removed from high- and low-moisture biocrudes washed with aqueous solutions of formic acid (0.7 weight% of UWBC , 80 °C, 1 hour)**

| <b>High-Moisture<br/>UWBC Middle Oil</b> | <b>Metal Transferred to Aqueous, wt% (ICP)</b> |      |        |        |       |
|------------------------------------------|------------------------------------------------|------|--------|--------|-------|
| <b>UWBC:Water<br/>Mass Ratio</b>         | Al                                             | Fe   | K      | Mg     | Na    |
| <b>5:1</b>                               | 1.91                                           | 0.15 | 66.77  | 35.91  | 66.56 |
| <b>10:3</b>                              | 3.17                                           | 0.25 | 100    | 81.0   | 98    |
| <b>5:2</b>                               | 3.60                                           | 0.29 | 89.08  | 55.74  | 89.36 |
| <b>2:1</b>                               | 4.35                                           | 0.35 | 94.04  | 58.75  | 91.61 |
| <b>5:3</b>                               | 5.80                                           | 0.47 | 95.63  | 53.25  | 96.90 |
| <b>1:1</b>                               | 7.34                                           | 0.59 | 104    | 55.00  | 103   |
|                                          |                                                |      |        |        |       |
| <b>Low-Moisture<br/>UWBC</b>             | <b>Metal Extracted into Aqueous, wt% (ICP)</b> |      |        |        |       |
| <b>UWBC:Water<br/>Mass Ratio</b>         | Al                                             | Fe   | K      | Mg     | Na    |
| <b>5:1</b>                               | 1.0                                            | 0.06 | 79.8   | 91.5   | 68.5  |
| <b>10:3</b>                              | 1.4                                            | 0.08 | 88.4   | 99.99  | 79.3  |
| <b>5:2</b>                               | 2.2                                            | 0.10 | 100.39 | 118.59 | 89.4  |
| <b>2:1</b>                               | 2.5                                            | 0.26 | 94.1   | 107.43 | 82.1  |
| <b>5:3</b>                               | 3.1                                            | 0.18 | 94.5   | 106.7  | 85.2  |
| <b>1:1</b>                               | 5.3                                            | 0.30 | 103.07 | 105.75 | 83.5  |



**Figure S13. Metal removal from low-moisture (top) and high moisture UWBC at various wash times at 80C, 0.7 weight% formic acid.**

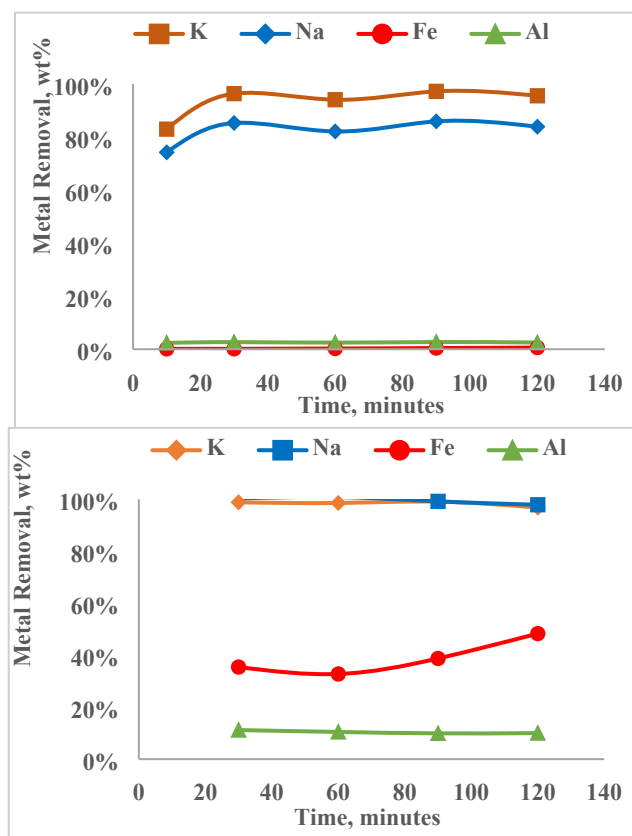

**Table S14. Compounds Identified by HPLC in Recovered Aqueous in Scaled Up Washes**

| Peak Name                     | Wt%          | Mass  |
|-------------------------------|--------------|-------|
| Glycolic Acid                 | 0.002        | 0.002 |
| Glycerol                      | 0.031        | 0.033 |
| <b>Formic Acid</b>            | <b>0.905</b> | 0.970 |
| Acetic Acid                   | 0.017        | 0.018 |
| Ethylene Glycol               | 0.003        | 0.003 |
| Propylene Glycol              | 0.002        | 0.002 |
| 1,3-propanediol               | 0.006        | 0.006 |
| Propanoic Acid                | 0.004        | 0.004 |
| 1,2-butanediol                | 0.001        | 0.001 |
| <b>Ethanol</b>                | <b>0.163</b> | 0.175 |
| Butanoic Acid                 | 0.003        | 0.003 |
| Acetone                       | 0.03         | 0.032 |
| tert-Butanol                  | 0.008        | 0.009 |
| 1-propanol                    | 0.012        | 0.013 |
| MEK (2-butanone)              | 0.019        | 0.020 |
| 2-butanol                     | 0.004        | 0.004 |
| 2-methyl-1-propanol           | 0.007        | 0.008 |
| 3-methyl-2-butanone           | 0.01         | 0.011 |
| 1-butanol                     | 0.018        | 0.019 |
| 2-pentanone                   | 0.002        | 0.002 |
| 2-cyclopenten-1-one           | 0.001        | 0.001 |
| 3-methyl-2-(5H)-furanone      | 0.002        | 0.002 |
| 2-methylcyclopentanone        | 0.012        | 0.013 |
| 3-hexanone                    | 0.008        | 0.009 |
| Phenol                        | 0.004        | 0.004 |
| 3-methyl-2-cyclopentene-1-one | 0.015        | 0.016 |
| o-Cresol                      | 0.003        | 0.003 |
| m-Cresol                      | 0.008        | 0.009 |
| p-Cresol                      | 0.009        | 0.010 |
| <b>Total</b>                  | <b>1.309</b> | 1.403 |
| <b>Total – Formate</b>        | <b>0.404</b> | 0.433 |

**Table S15. Compounds identified in Recovered Aqueous by GC-MS.**

| Compound                  |                              |
|---------------------------|------------------------------|
| Ethanol                   | 2-methyl-2-Cyclopenten-1-one |
| Acetone                   | 1-ethyl-2,5-Pyrrolidinedione |
| 2-amino-1-Propanol        | 1,3-Diazine                  |
| 1-Propanol                | L-Alanine, ethyl ester       |
| 2-Butanamine              | methyl-Pyrazine              |
| dihydro-2-methyl-Furanone | 5-methyl-2-Hexanamine        |
| sec-Butylamine            | 2,6-dimethyl-Pyrazine        |

**Table S16. Metal Content Removed from Biocrude after Washing.**

| <i>Analyte Name</i> | <i>Average<br/>PPM in WBC</i> |
|---------------------|-------------------------------|
| <i>Al</i>           | 15                            |
| <i>Fe</i>           | 271                           |
| <i>Ca</i>           | 52                            |
| <i>K</i>            | 50                            |
| <i>P</i>            | <12                           |
| <i>Mg</i>           | 22                            |
| <i>Na</i>           | 110                           |
| <i>Si</i>           | 175                           |
| <i>Zn</i>           | <12                           |

**Table S17. Metals Removed from Biocrude after Washing. 0.75 weight% formic acid**

| <i>Analyte Name</i> | <i>% Removal<br/>from UWBC</i> |
|---------------------|--------------------------------|
| <i>Al</i>           | 5%                             |
| <i>Fe</i>           | 2%                             |
| <i>K</i>            | 87%                            |
| <i>Mg</i>           | 21%                            |
| <i>Na</i>           | 84%                            |
| <i>Si</i>           | 8%                             |

**Table S18. Hydrotreating Yield Data**

|                                             | HT1-<br>WBC | HT2-<br>WBC | HT3-<br>WBC | HT1-<br>UWBC | HT2-<br>UWBC | HT3-<br>UWBC |
|---------------------------------------------|-------------|-------------|-------------|--------------|--------------|--------------|
| <b>WHSV (H-1)</b>                           | 1.25        | 1.5         | 1.75        | 1.25         | 1.5          | 1.75         |
| <b>YIELDS ANALYSIS (DRY-BASIS)</b>          |             |             |             |              |              |              |
| <b>OIL YIELD (G/G FEED)</b>                 | 0.827       | 0.859       | 0.949       | 0.827        | 0.870        | 0.850        |
| <b>AQ YIELD (G/G FEED)</b>                  | 0.116       | 0.097       | 0.011       | 0.129        | 0.087        | 0.115        |
| <b>GAS YIELD (G/G FEED)</b>                 | 0.058       | 0.043       | 0.040       | 0.044        | 0.043        | 0.035        |
| <b>H<sub>2</sub> CONSUMPTION (G/G FEED)</b> | 0.032       | 0.024       | 0.029       | 0.028        | 0.030        | 0.032        |

**Figure S19. SIMDIST of the hydrotreated product versus fuel oil**

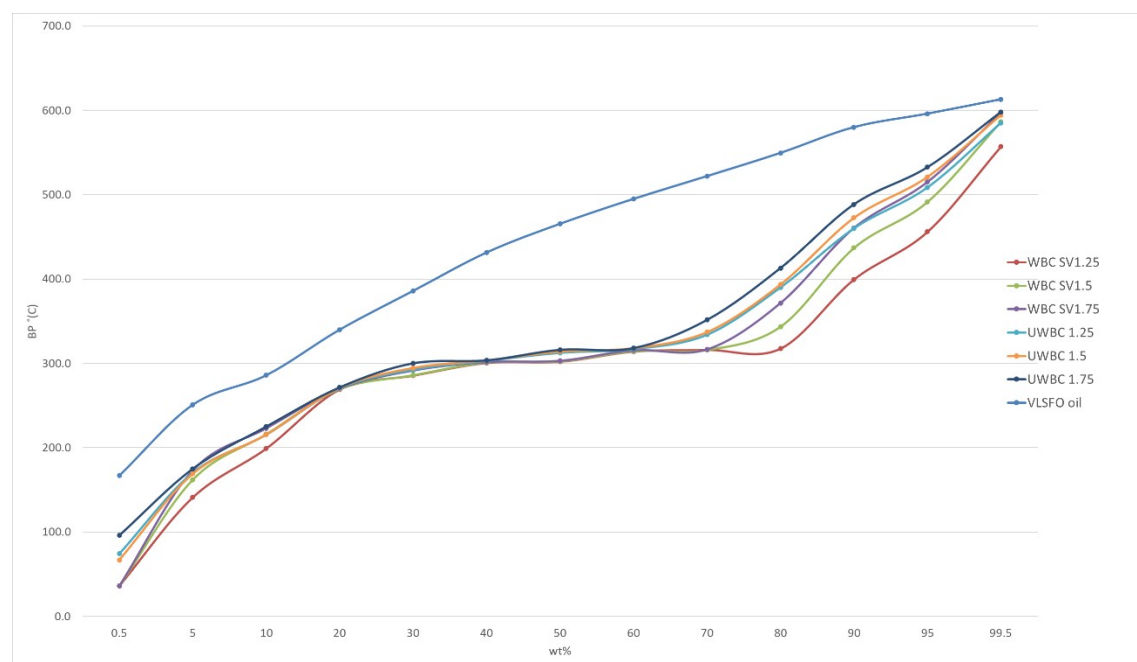

## **S20. Process description of wet waste hydrothermal liquefaction (HTL) without a water wash process**

In the base case, the HTL plant processes 1,000 dry metric tons of sludge a day and the sludge cost at the gate of the HTL plant is assumed to be zero. Sludge is dewatered to 25% solid content and then pumped into the HTL reactor. HTL reactor operating conditions are near the subcritical water status, which results in high solubility of organic compounds. To reach such operating conditions, the feed slurry is first pumped to 20 MPa and then heated in the heat exchanger and trim heater to 350 °C. The HTL reactor has a shell-and-tube structure, with feed slurry on the tube side and hot heating oil on the shell side. After the reaction, the wet waste is converted into biocrude, an aqueous phase, and a small number of solids and gases. In a solid-liquid-gas three-phase separator, the solid and gas are separated from the liquid, and the liquid effluents are then cooled for further aqueous–biocrude phase separation. The gas combined with natural gas is sent to a burner for generating heat to supply the HTL heating requirements via the hot oil system. The aqueous phase needs a series of treatment steps before recycling back to the wastewater treatment (WWT) plant. Specifically, it is first treated with quicklime to raise the pH to ~11 and then stripped with air to remove ammonia and volatile organics (VOCs) from the aqueous stream. The ammonia and VOCs can be destroyed in a thermal oxidizer (THROX) with the help of natural gas and a catalyst. At the same time, the liquid at the bottom of the stripper is further treated to decrease COD before recycling back to WWT plants.

Table S21 summarizes the primary economic assumptions for the “nth-plant” method employed in this study. This method does not account for special financing, equipment redundancies, large contingencies, and long start-up times because it assumes that several plants have already been built and are operating.

**Table S21. Key assumptions for the technoeconomic analysis.**

| Assumption Description            | Assumed Value                                                                             |
|-----------------------------------|-------------------------------------------------------------------------------------------|
| Cost year                         | 2016 \$                                                                                   |
| Internal rate of return (IRR)     | 10%                                                                                       |
| Plant financing debt/equity       | 60% / 40% of total capital investment (TCI)                                               |
| Plant life                        | 30 years                                                                                  |
| Income tax rate                   | 21%                                                                                       |
| Interest rate for debt financing  | 8.0% annually                                                                             |
| Term for debt financing           | 10 years                                                                                  |
| Working capital cost              | 5.0% of fixed capital investment (excluding land)                                         |
| Depreciation schedule             | 7-year MACRS schedule <sup>a</sup>                                                        |
| Construction period               | 3 years (8% 1 <sup>st</sup> yr, 60% 2 <sup>nd</sup> yr, 32% 3 <sup>rd</sup> yr)           |
| Plant salvage value               | No value                                                                                  |
| Start-up time                     | 6 months                                                                                  |
| Revenue and costs during start-up | Revenue = 50% of normal<br>Variable costs = 75% of normal<br>Fixed costs = 100% of normal |
| On-stream factor                  | 90% (7,920 operating hours per year)                                                      |

<sup>a</sup> Modified accelerated cost recovery system
